# Supplementary material for: Can causal discovery lead to a more robust prediction model for runoff signatures?
Source: Copernicus journal article supplement (doi:10.5194/hess-2024-297), 2024-10-02
Supplement: Supplementary file 1 [file hess-2024-297-supplement.pdf]

# Supplementary Materials

Hossein Abbasizadeh<sup>1</sup>, Petr Maca<sup>1</sup>, Martin Hanel<sup>1</sup>, Mads Troldborg<sup>2</sup>, and Amir AghaKouchak<sup>3,4,5</sup>

<sup>1</sup>Faculty of Environmental Sciences, Czech University of Life Sciences Prague, Czech Republic

<sup>2</sup>The James Hutton Institute, Invergowrie, Dundee DD2 5DA, Scotland, UK

<sup>3</sup>Department of Civil and Environmental Engineering, University of California, Irvine, CA, USA

<sup>4</sup>United Nations University Institute for Water, Environment and Health, Hamilton, ON, Canada

<sup>5</sup>Department of Earth System Science, University of California, Irvine, CA, USA

**Correspondence:** Hossein Abbasizadeh (abbasizadeh@fzp.czu.cz)

The results of feature selection, correlation analysis, variable importance, PC algorithm, and models' performances for each signature are as follows:

## 1 Baseflow Index (baseflow\_index)

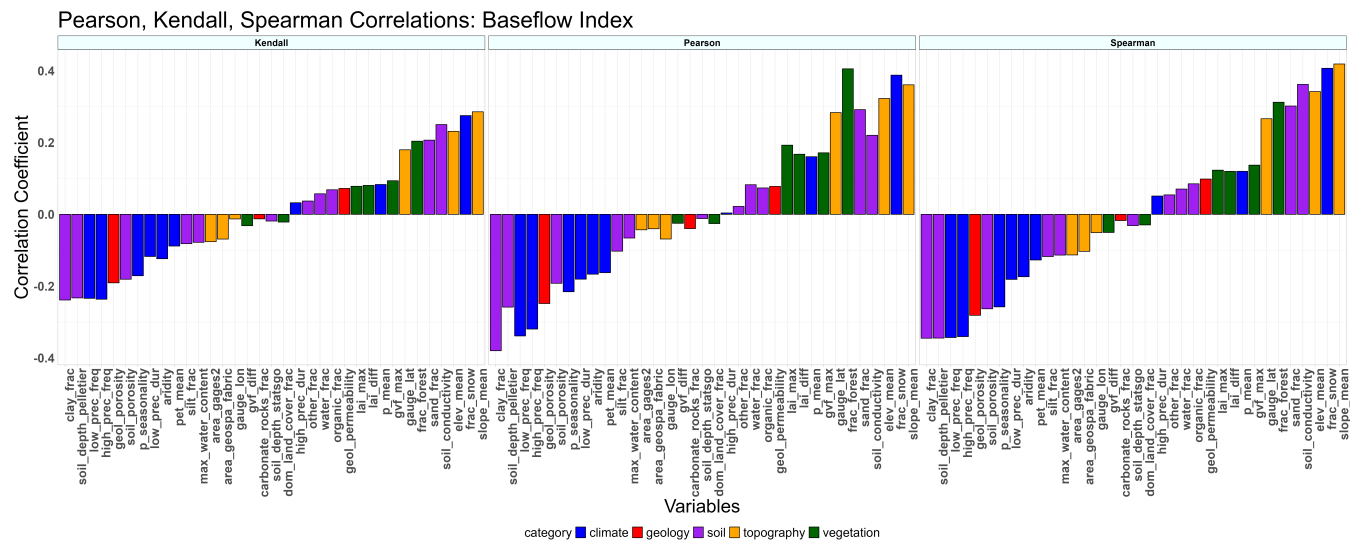

**Fig S 1.** Correlation analysis between catchment and climate attributes and baseflow index

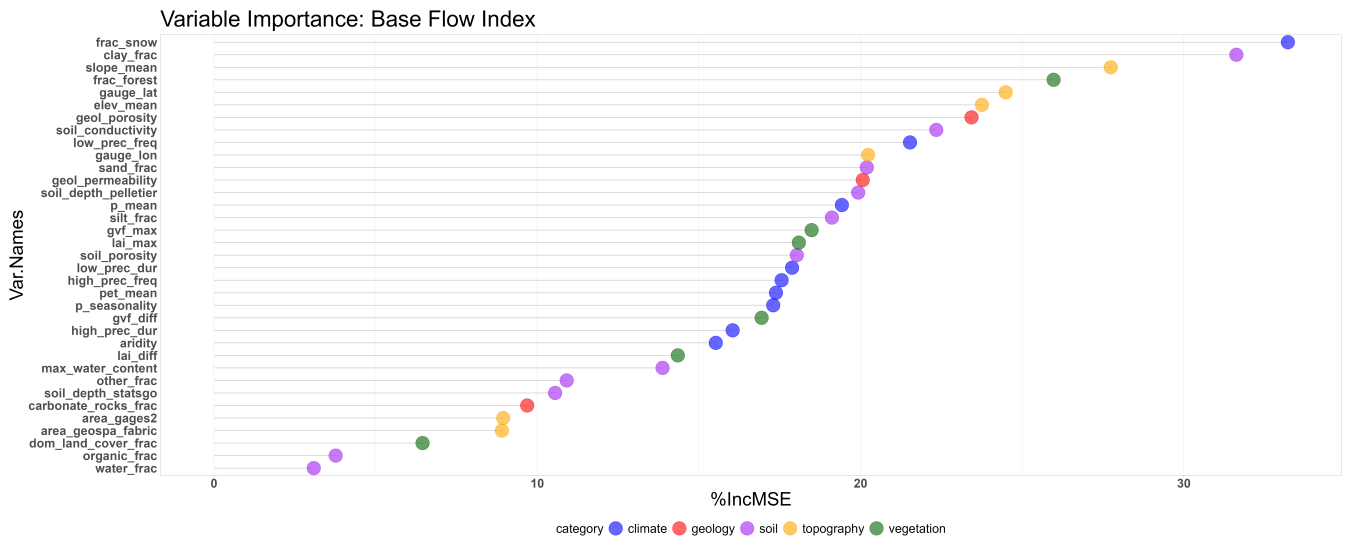

**Fig S 2.** Random forest variable importance analysis between catchment and climate attributes and baseflow index

Estimated DAG for Baseflow Index

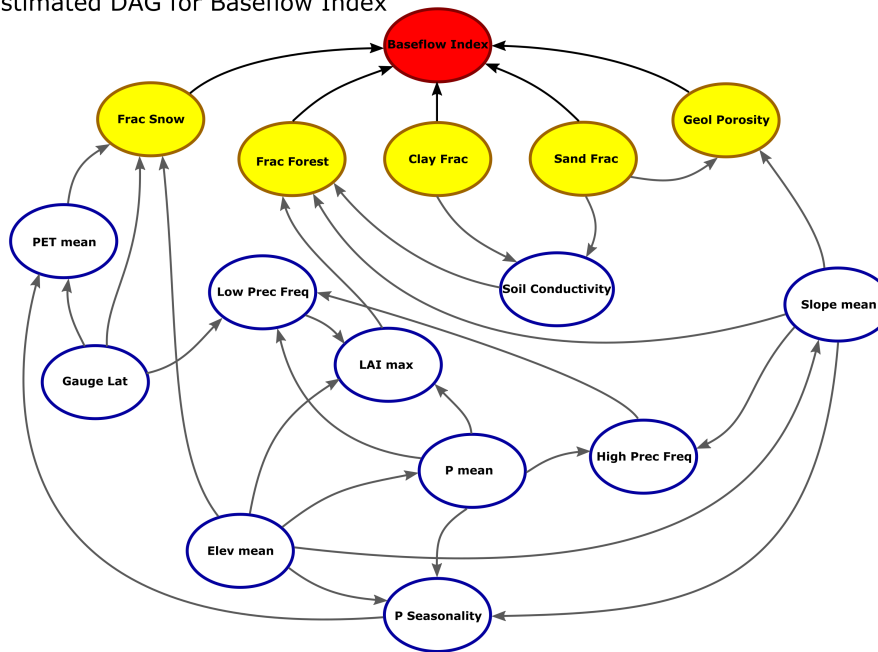

**Fig S 3.** Directed acyclic graph and selected variables for baseflow index.

## Baseflow Index: R-Squared vs RMSE

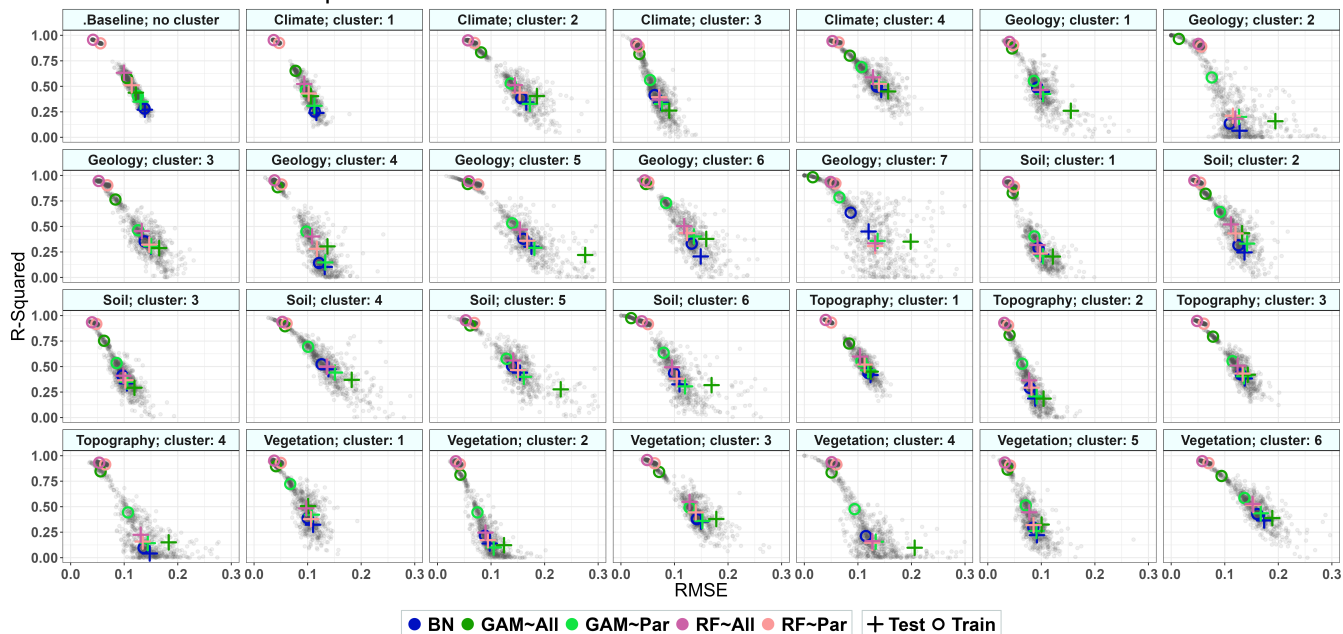

Fig S 4. R squared vs RMSE in each cluster for all models for baseflow index.

## 2 High Flow Duration (high\_q\_dur)

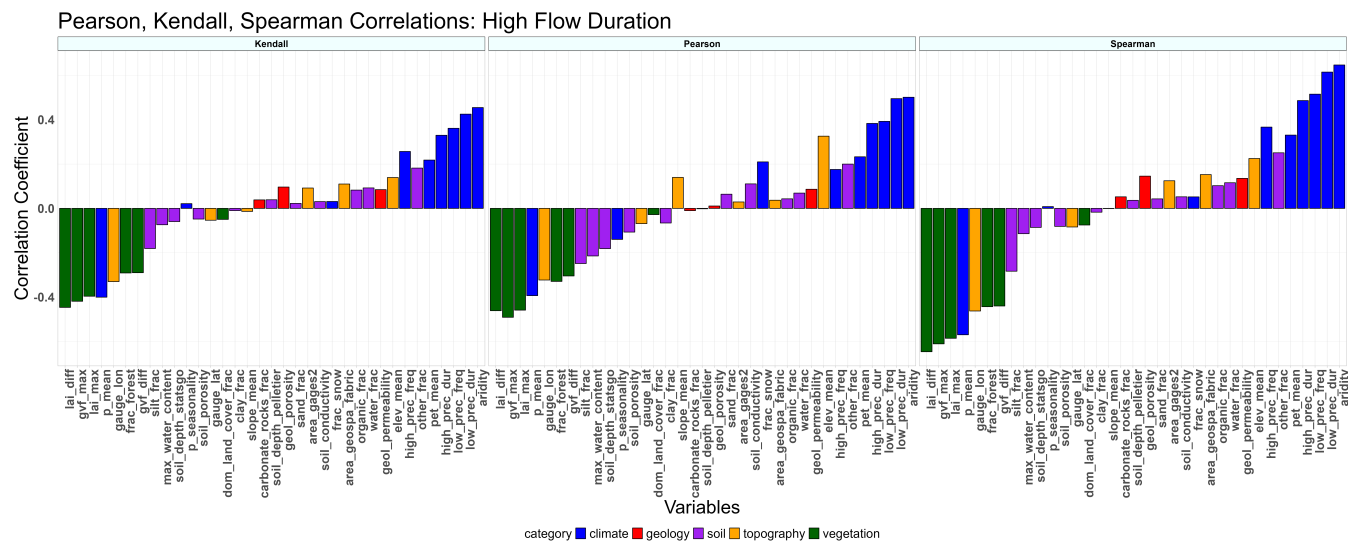

Fig S 5. Correlation analysis between catchment and climate attributes and high flow duration

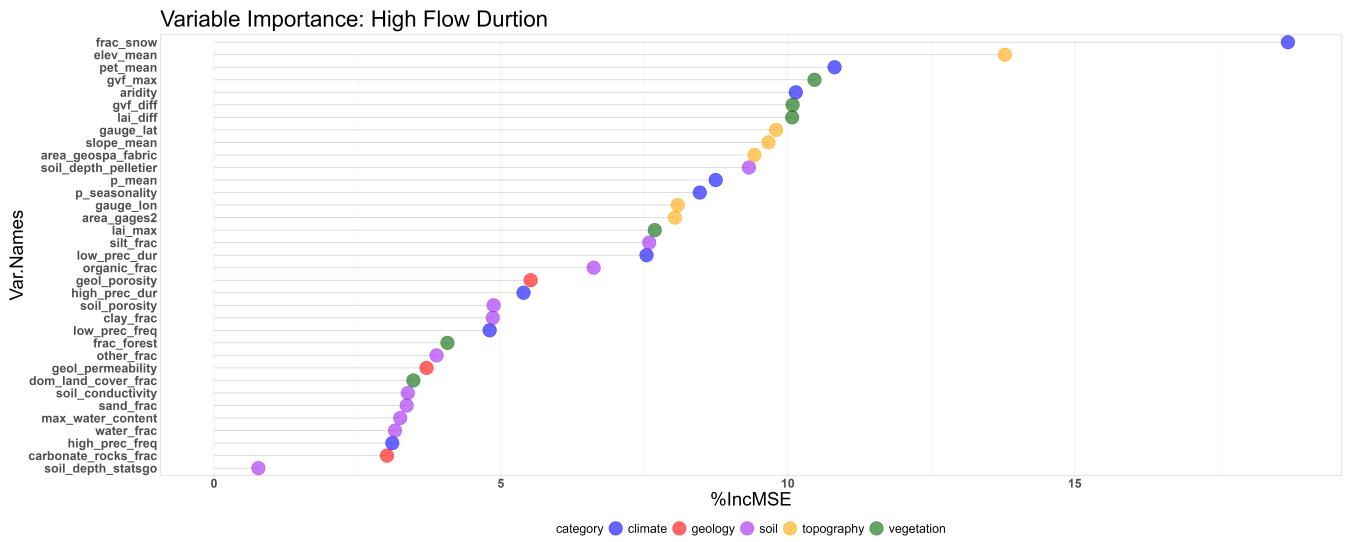

**Fig S 6.** Random forest variable importance analysis between catchment and climate attributes and high flow duration

Estimated DAG for High Flow Duration

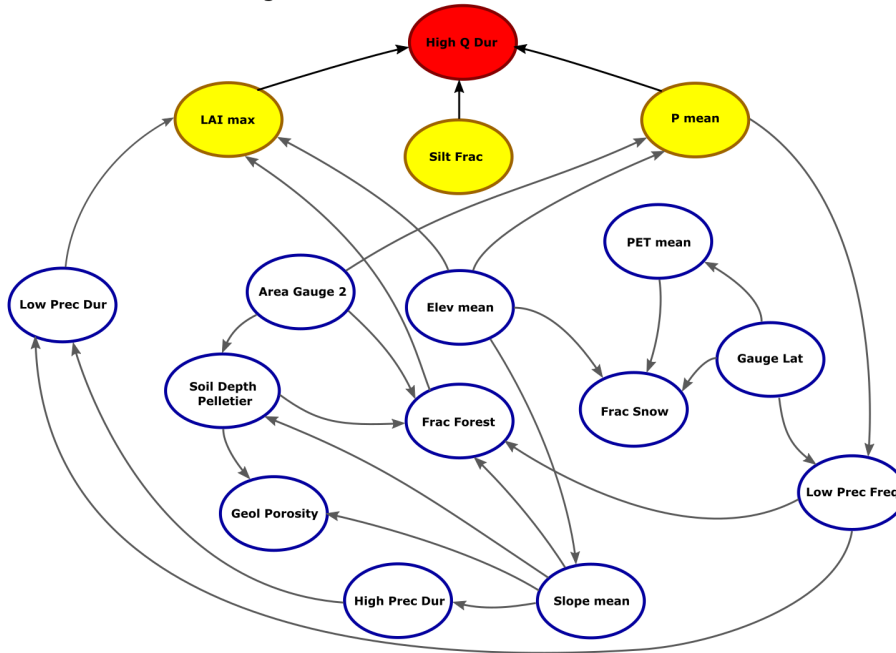

**Fig S 7.** Directed acyclic graph and selected variables for high flow duration

## High Q Duration: R-Squared vs RMSE

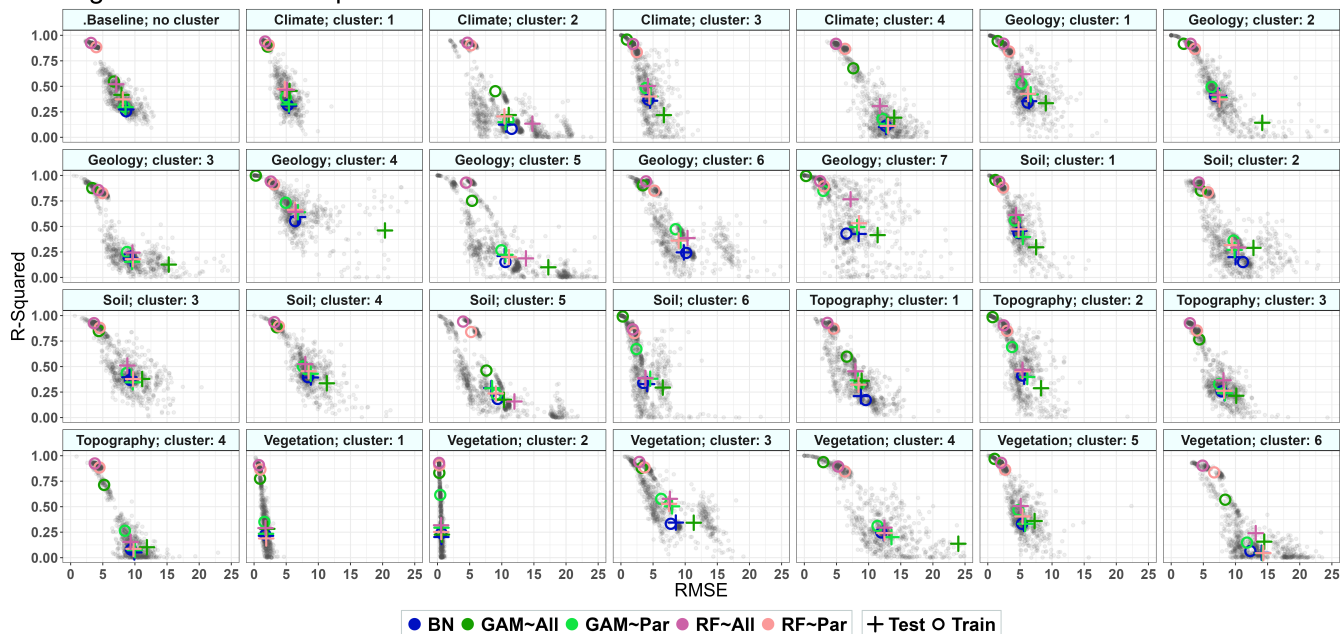

Fig S 8. R squared vs RMSE in each cluster for all models for high flow duration.

## 5 3 High Flow Frequency (high\_q\_freq)

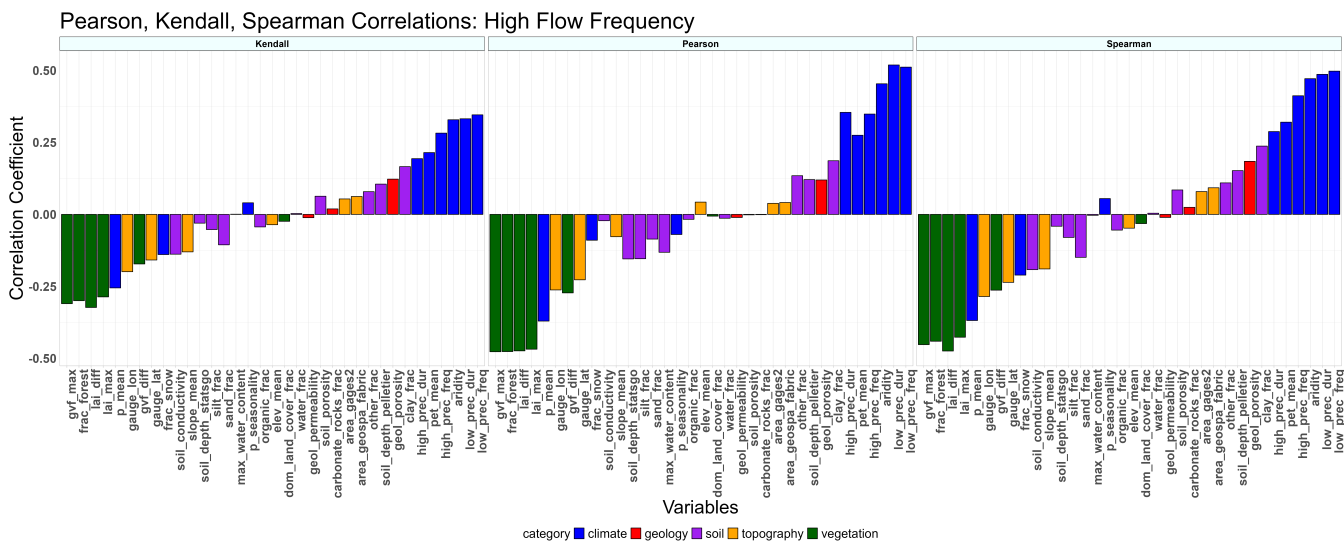

Fig S 9. Correlation analysis between catchment and climate attributes and high flow frequency

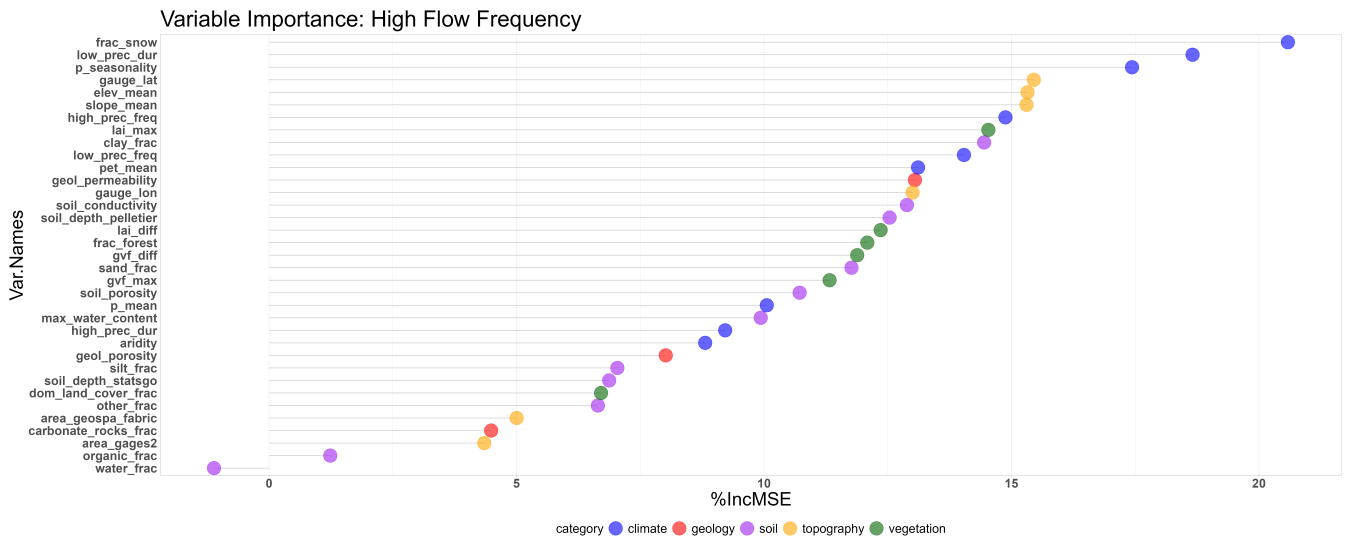

Fig S 10. Random forest variable importance analysis between catchment and climate attributes and high flow frequency

Estimated DAG for High Flow Frequency

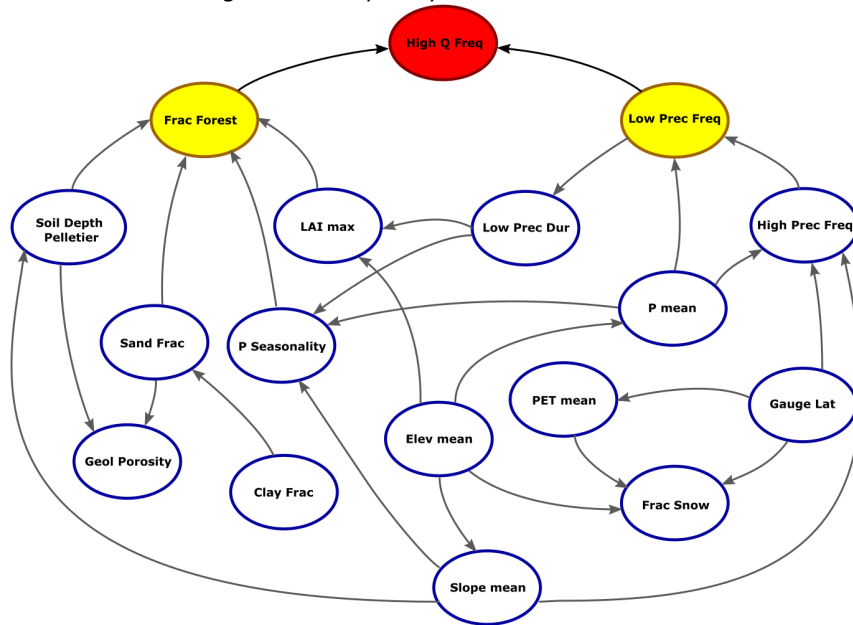

Fig S 11. Directed acyclic graph and selected variables for high flow frequency

### High Q Frequency: R-Squared vs RMSE

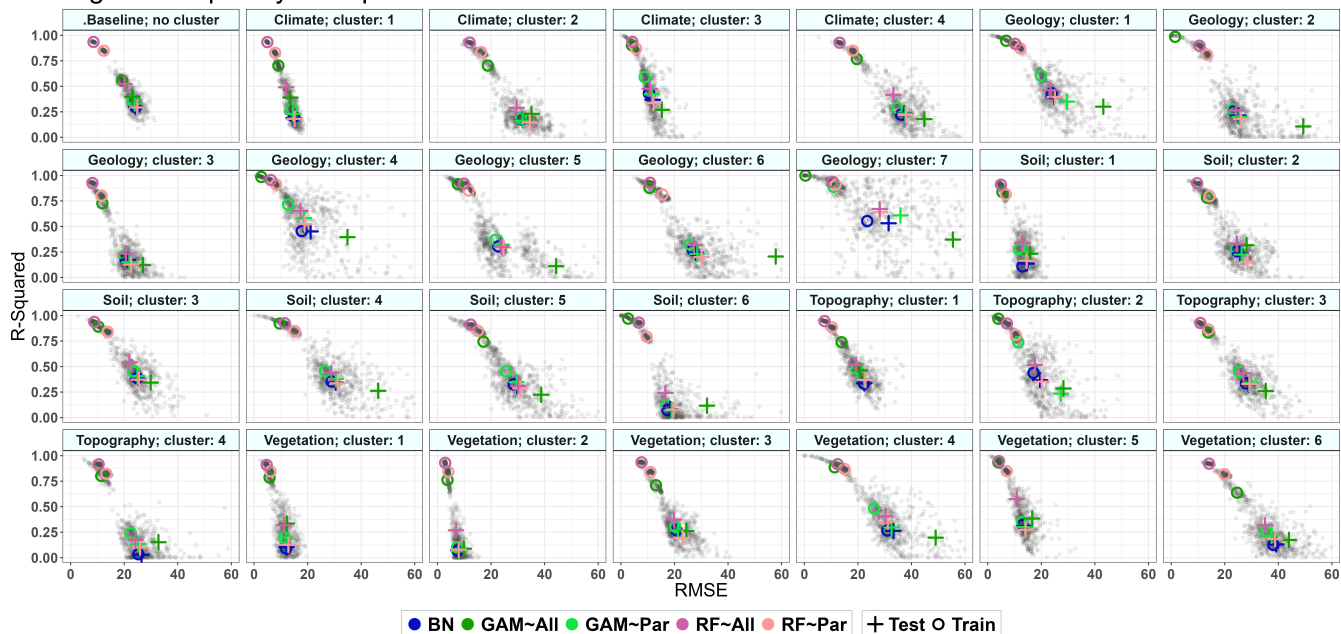

Fig S 12. R squared vs RMSE in each cluster for all models for high flow frequency.

### 4 Low Flow Duration (low\_q\_dur)

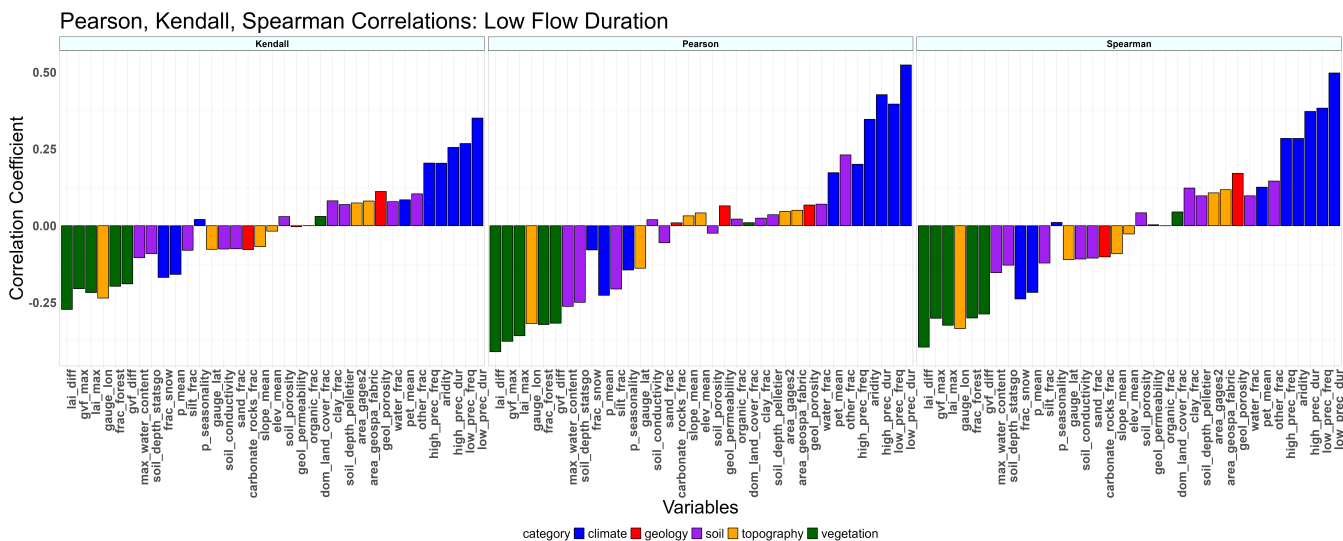

Fig S 13. Correlation analysis between catchment and climate attributes and low flow duration

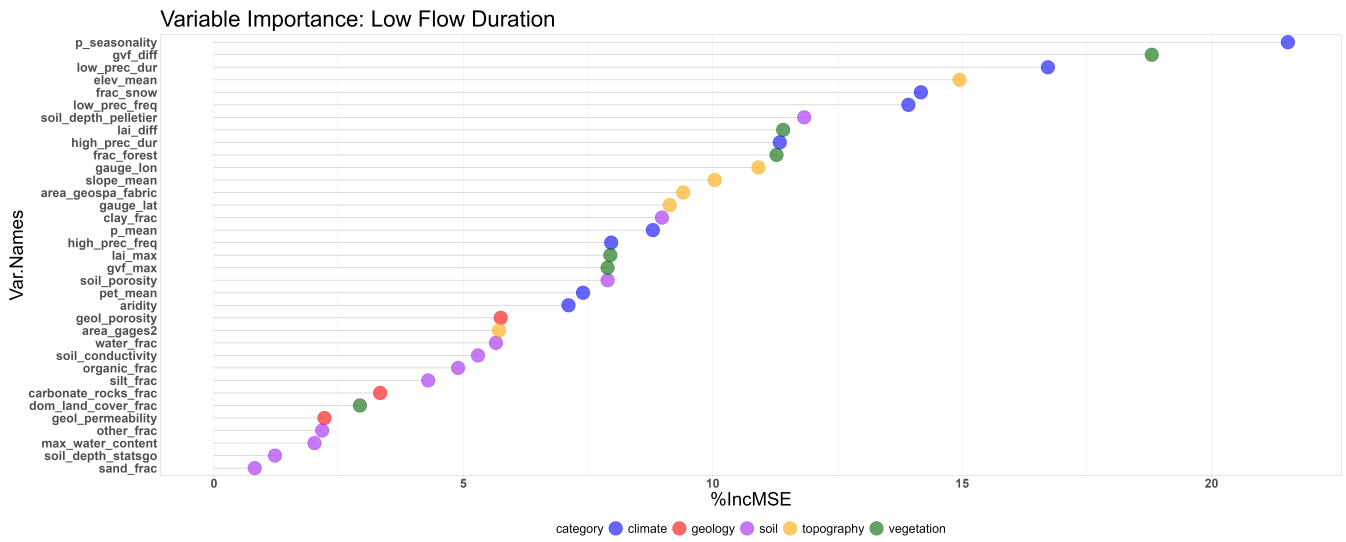

Fig S 14. Random forest variable importance analysis between catchment and climate attributes and low flow duration

Estimated DAG for Low Flow Duration

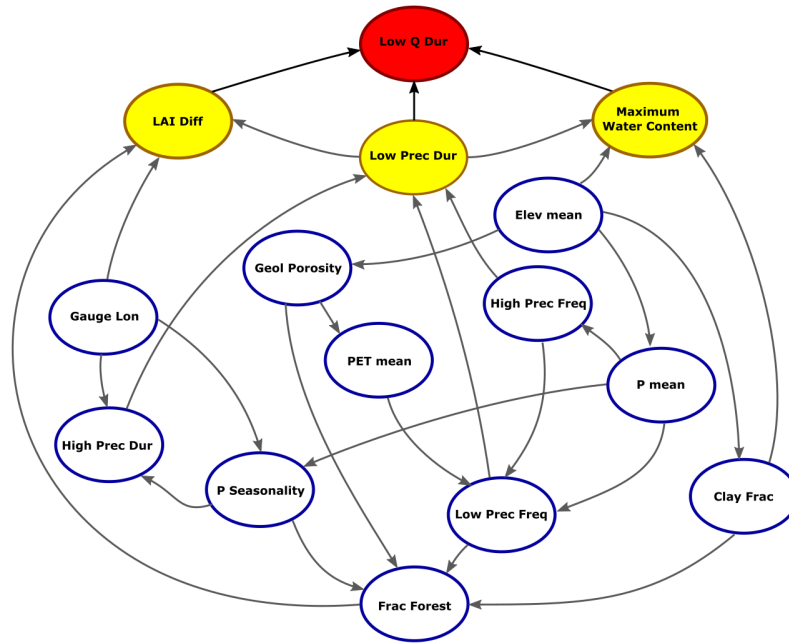

Fig S 15. Directed acyclic graph and selected variables for low flow duration



### Low Q Duration: R-Squared vs RMSE

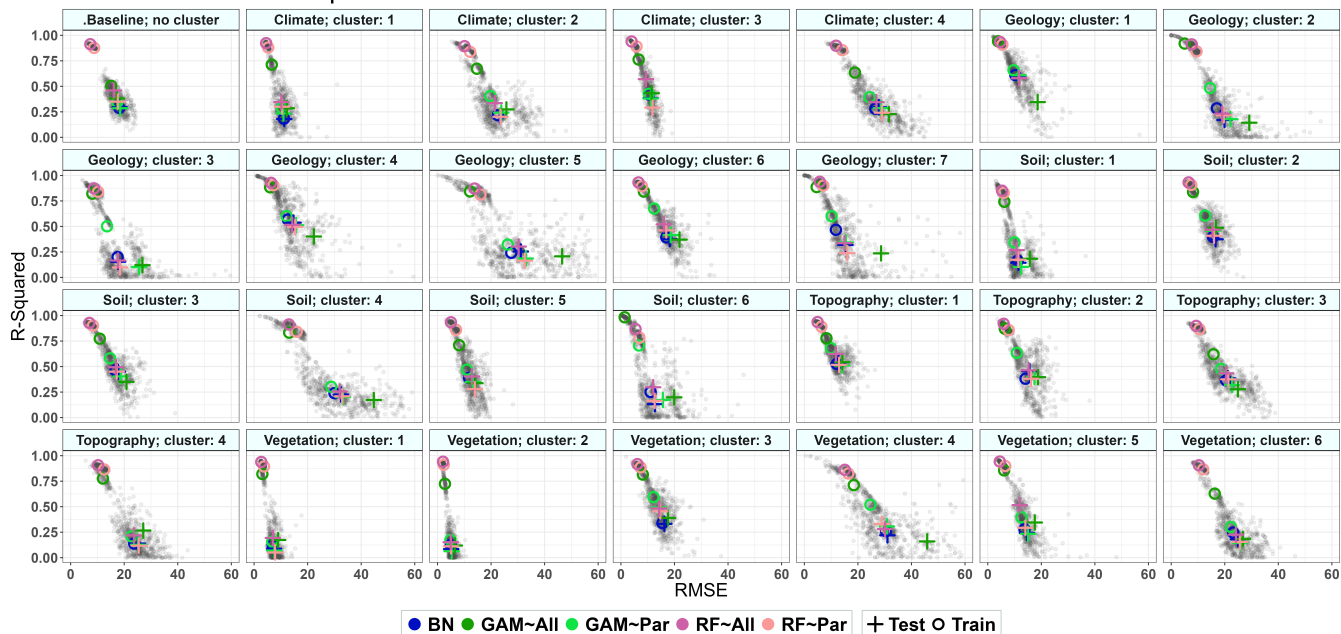

Fig S 16. R squared vs RMSE in each cluster for all models for low flow duration.

### 5 Low Flow Frequency (low\_q\_freq)

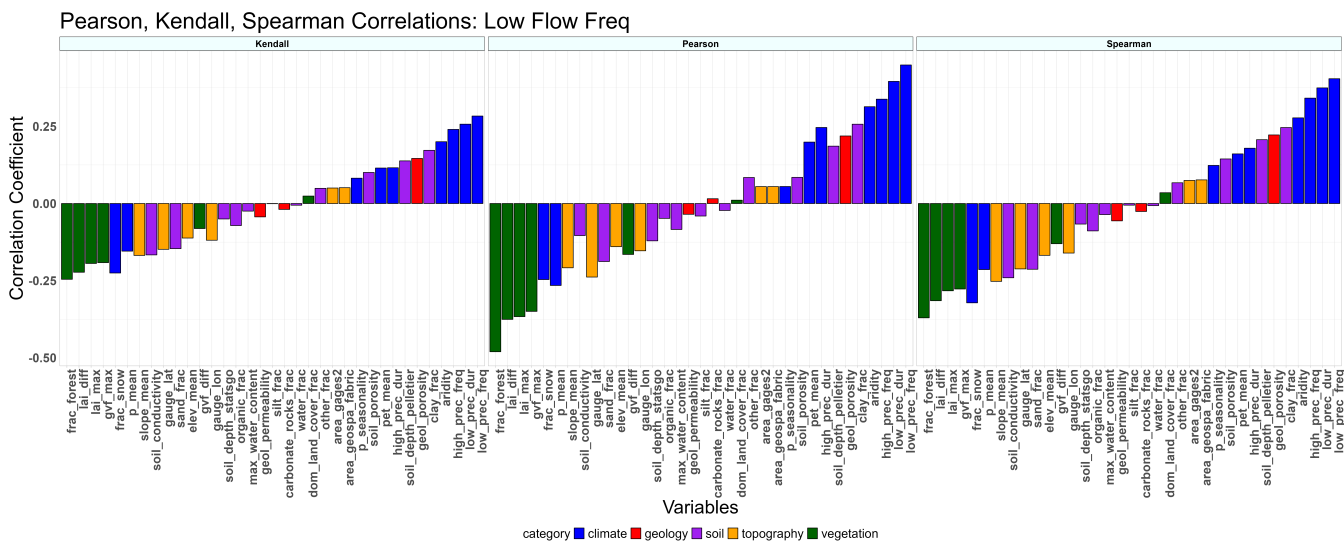

Fig S 17. Correlation analysis between catchment and climate attributes and low flow frequency

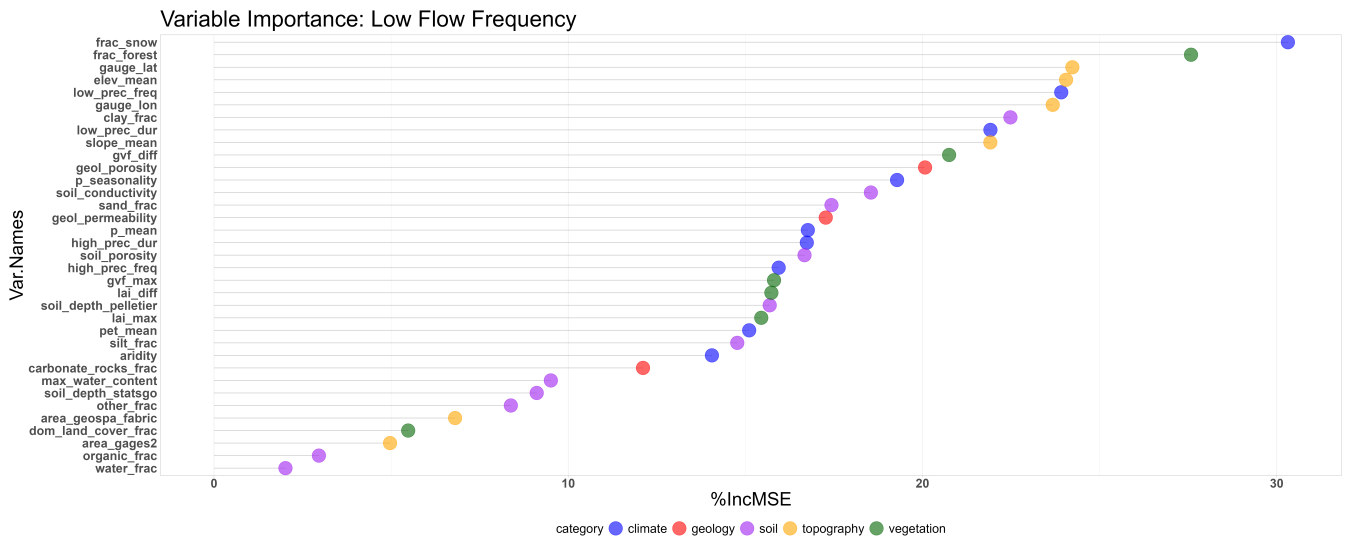

Fig S 18. Random forest variable importance analysis between catchment and climate attributes and low flow frequency

Estimated DAG for Low Flow Frequency

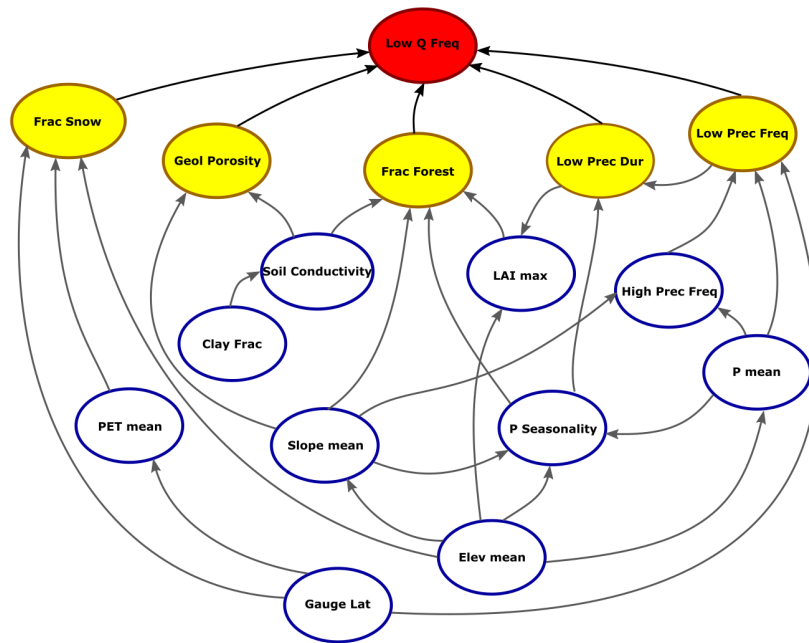

Fig S 19. Directed acyclic graph and selected variables for low flow frequency

### Low Q Frequency: R-Squared vs RMSE

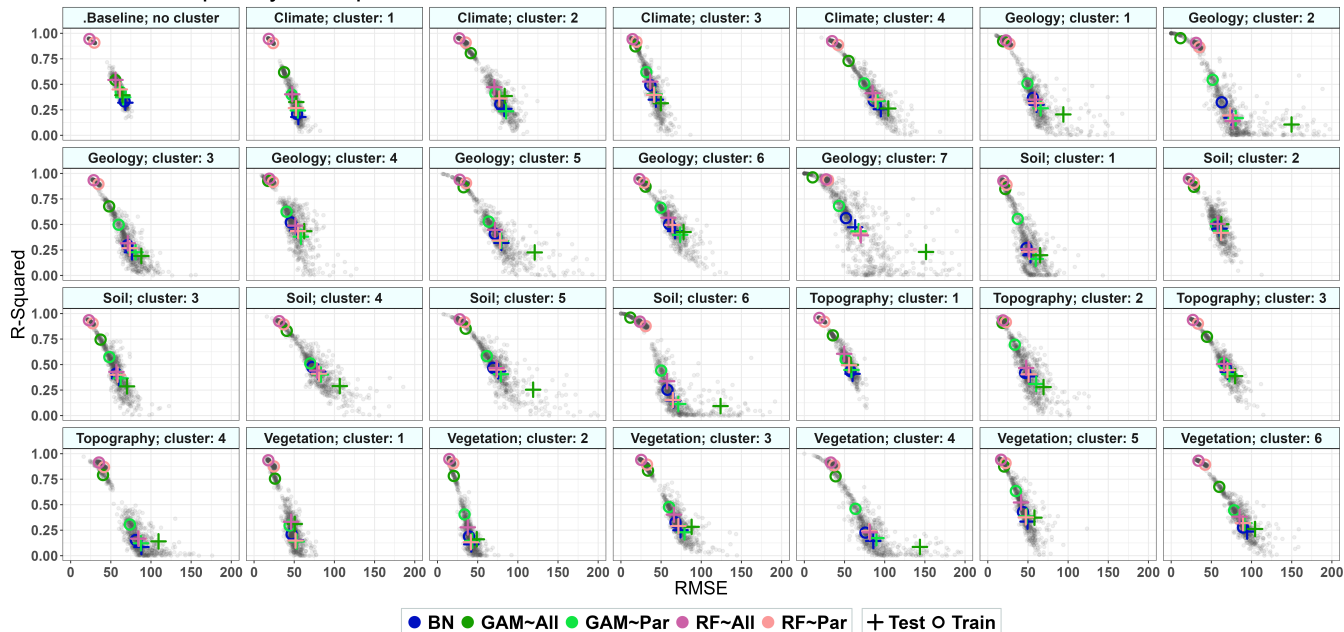

Fig S 20. R squared vs RMSE in each cluster for all models for low flow frequency.

## 6 Mean Daily Discharge ( $q_{mean}$ )

### Pearson, Kendall, Spearman Correlations: Mean Daily Flow

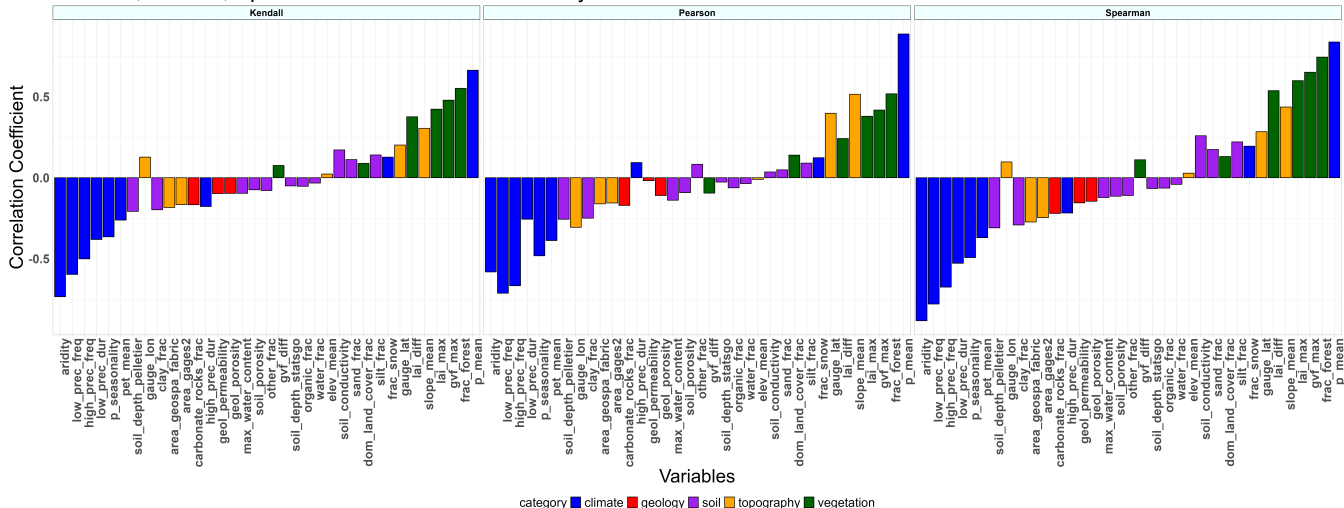

Fig S 21. Correlation analysis between catchment and climate attributes and mean daily flow

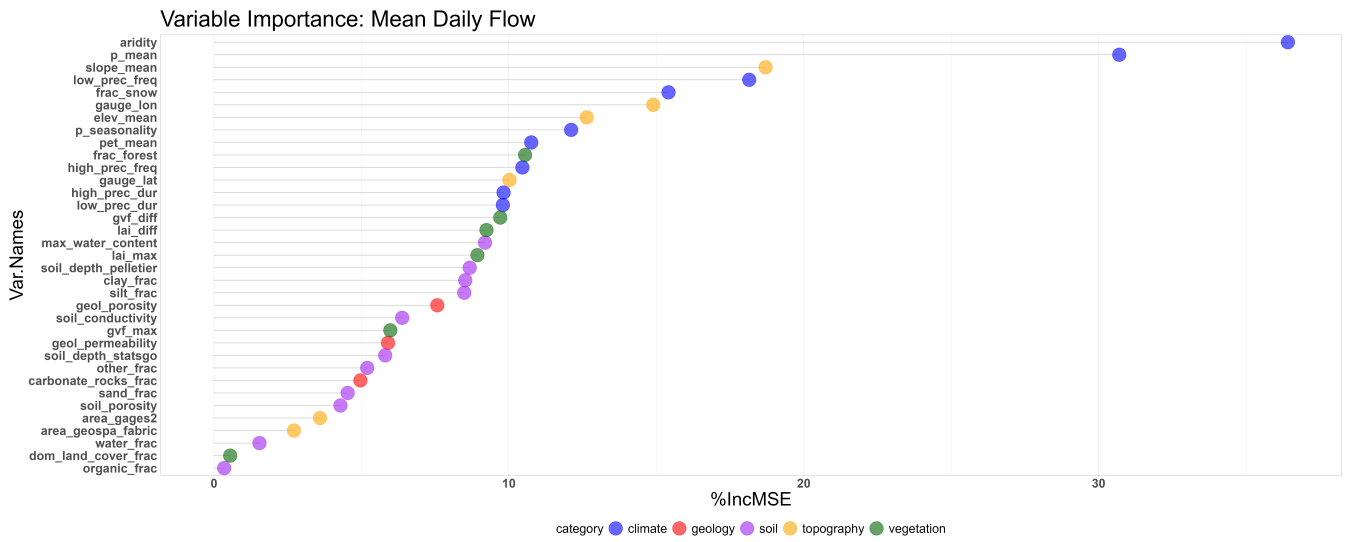

Fig S 22. Random forest variable importance analysis between catchment and climate attributes and mean daily flow

Estimated DAG for Mean Daily Flow

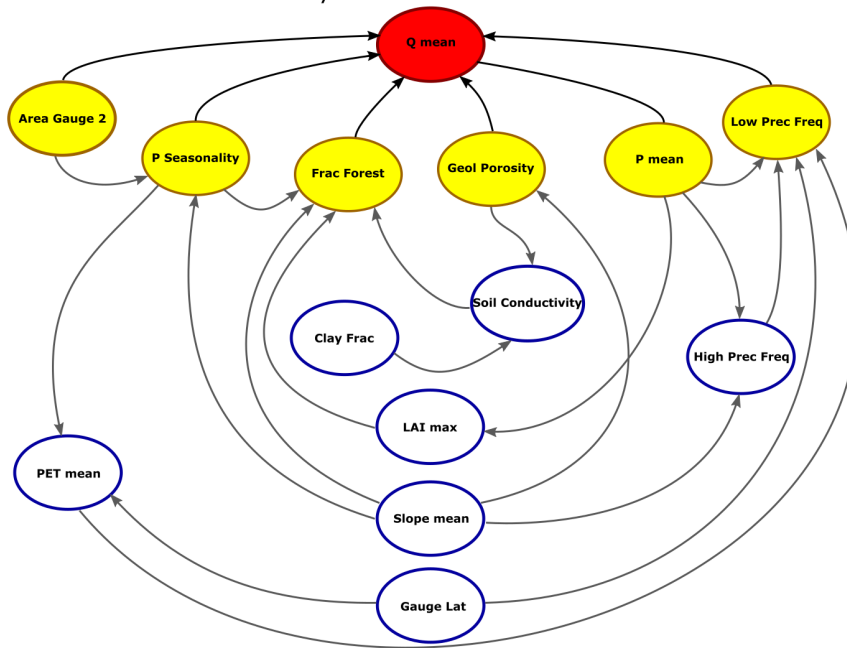

Fig S 23. Directed acyclic graph and selected variables for mean daily flow

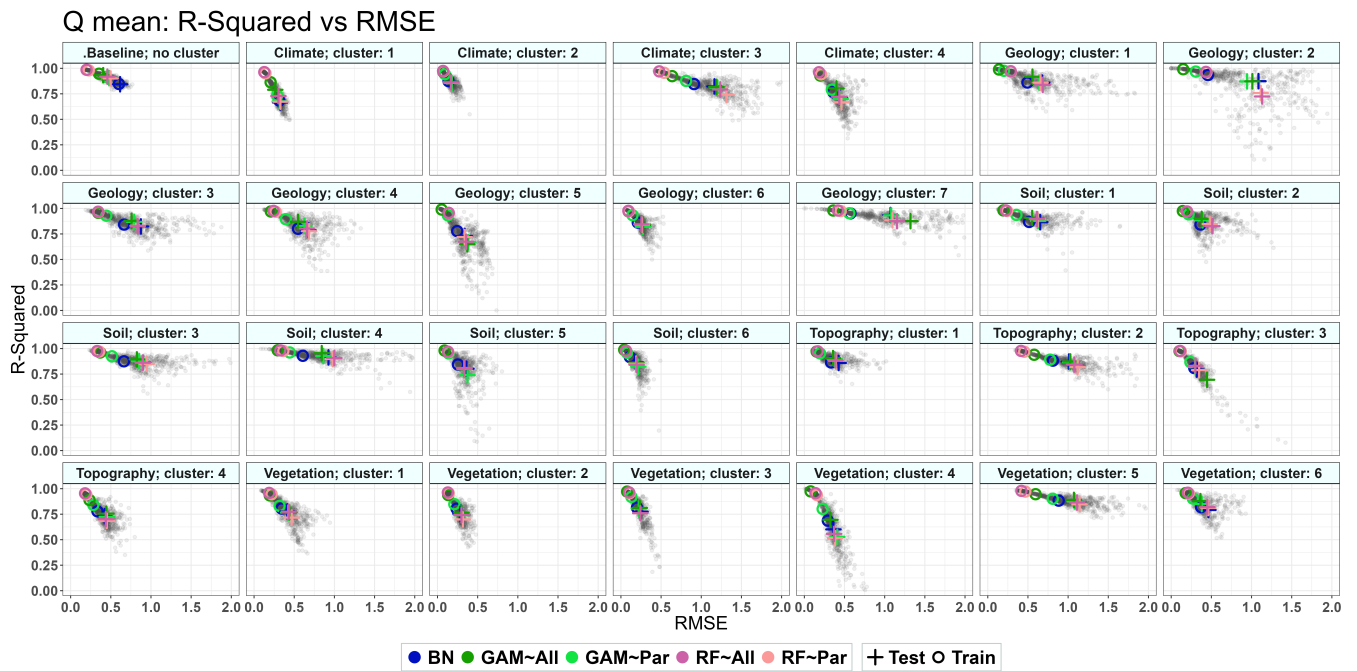

**Fig S 24.** R squared vs RMSE in each cluster for all models for mean daily flow.

## 7 Low Flow (Q5)

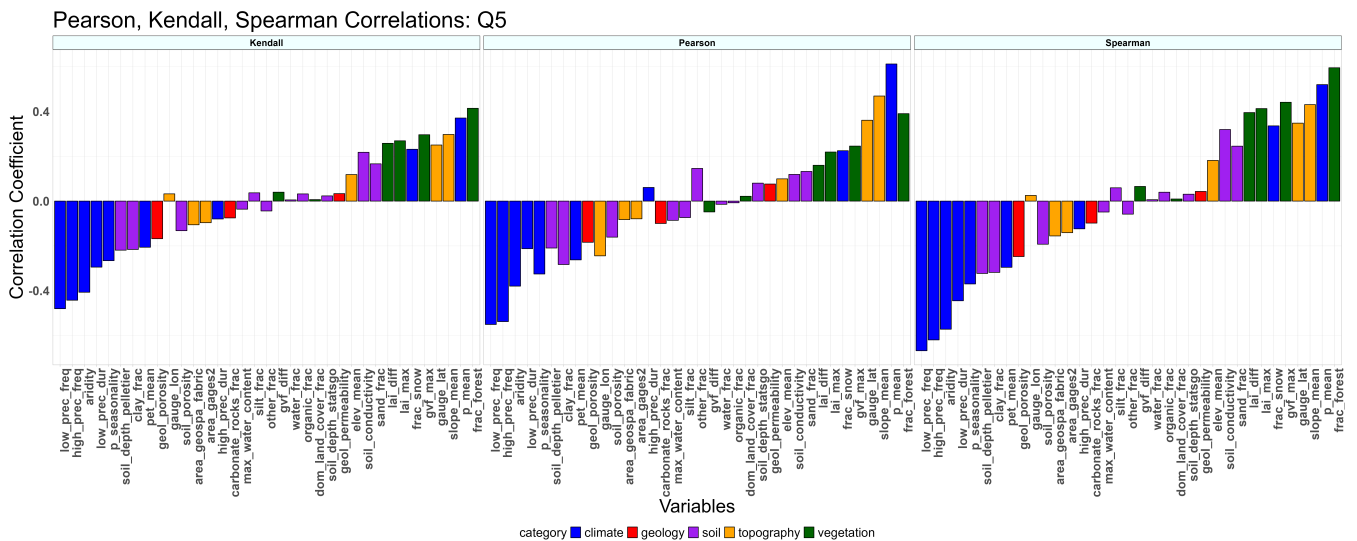

**Fig S 25.** Correlation analysis between catchment and climate attributes and low flow

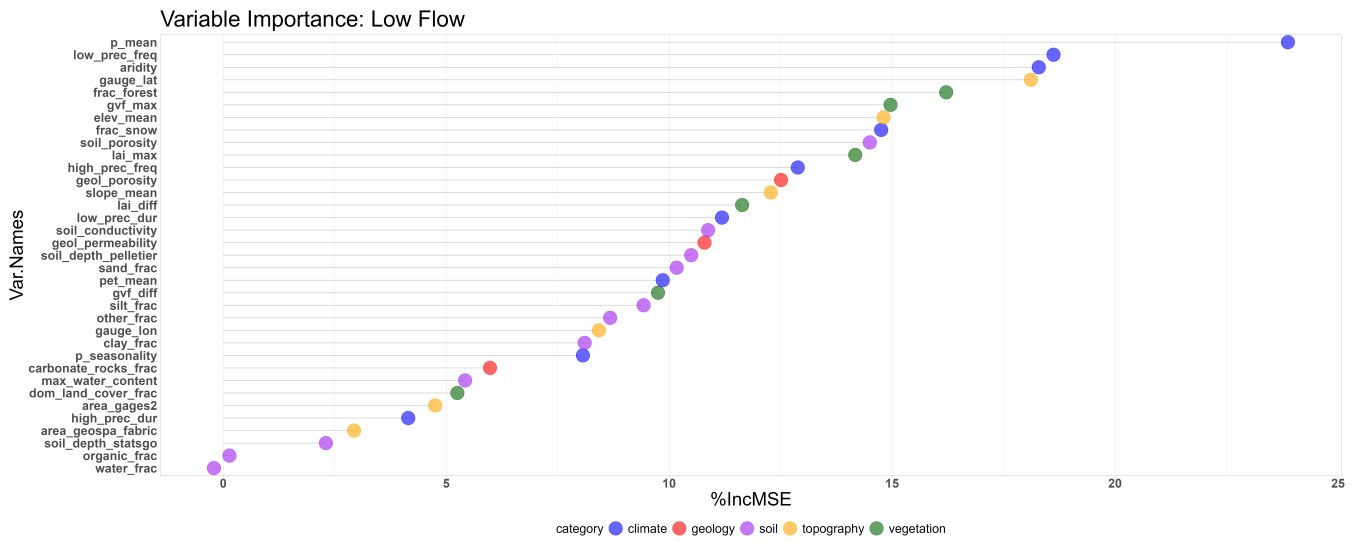

Fig S 26. Random forest variable importance analysis between catchment and climate attributes and low flow

Estimated DAG for Low Flow

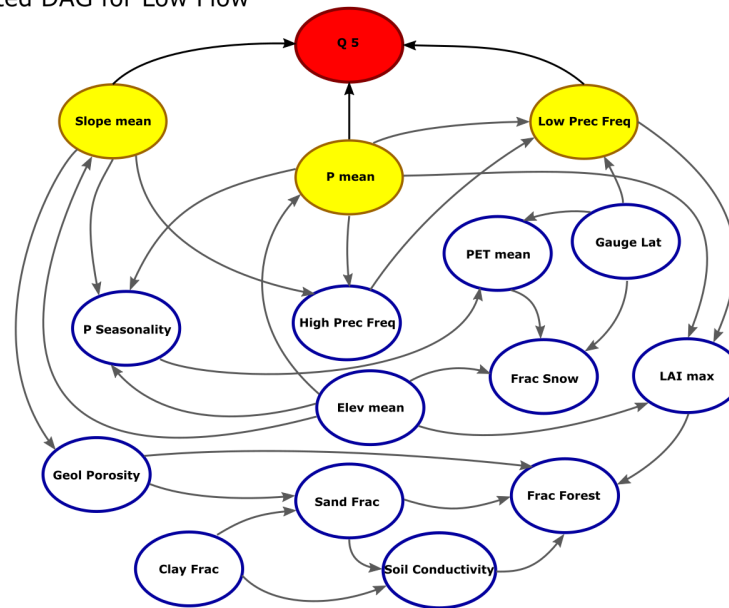

Fig S 27. Directed acyclic graph and selected variables for low flow

### Q5: R-Squared vs RMSE

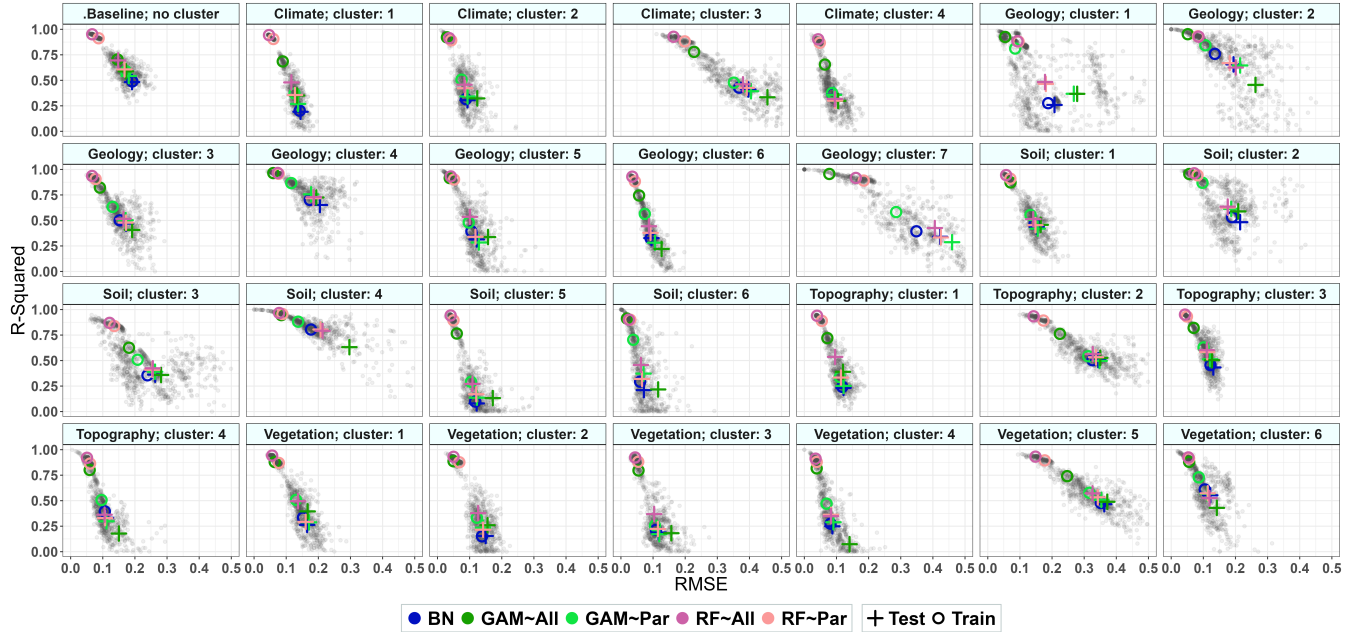

Fig S 28. R squared vs RMSE in each cluster for all models for low flow.

### 10 8 High Flow (Q95)

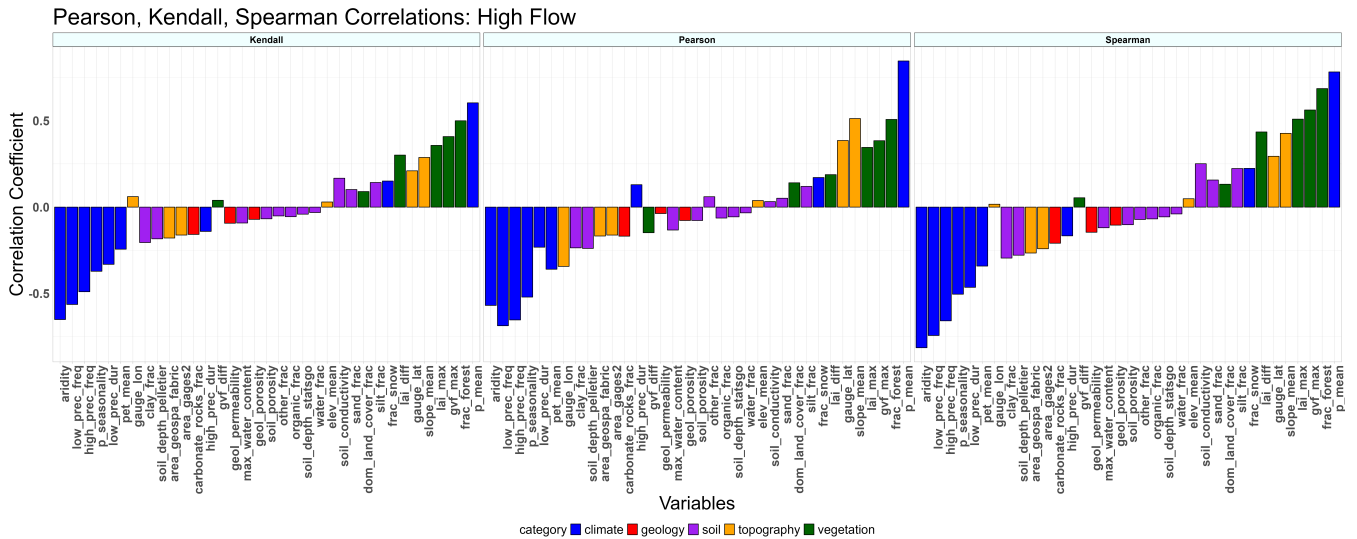

Fig S 29. Correlation analysis between catchment and climate attributes and high flow

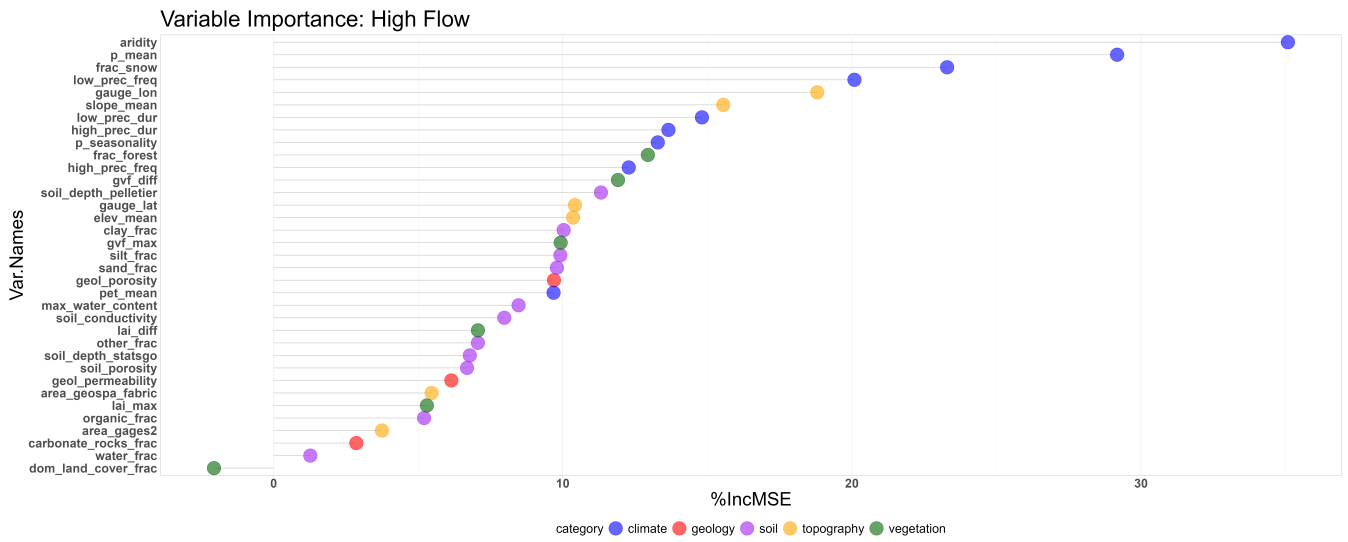

Fig S 30. Random forest variable importance analysis between catchment and climate attributes and high flow

Estimated DAG for High Flow

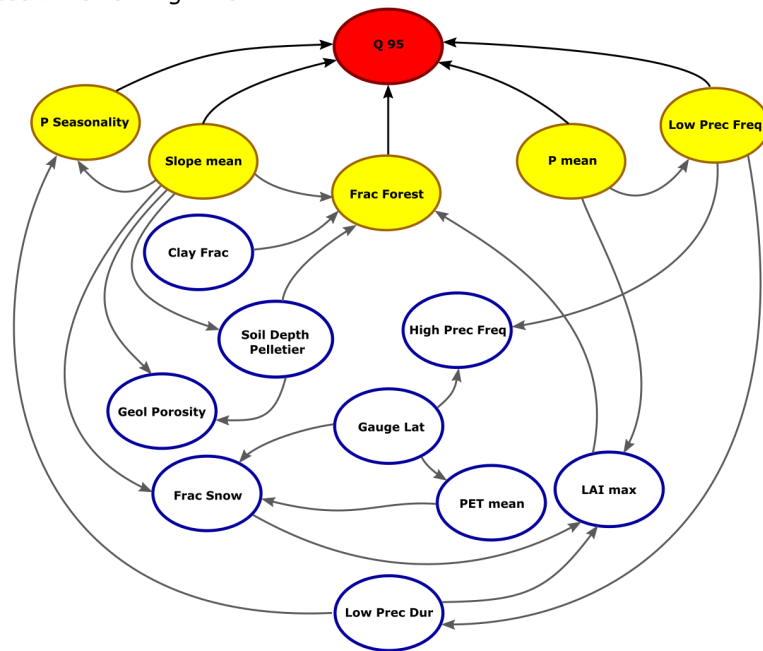

Fig S 31. Directed acyclic graph and selected variables for high flow



### Q95: R-Squared vs RMSE

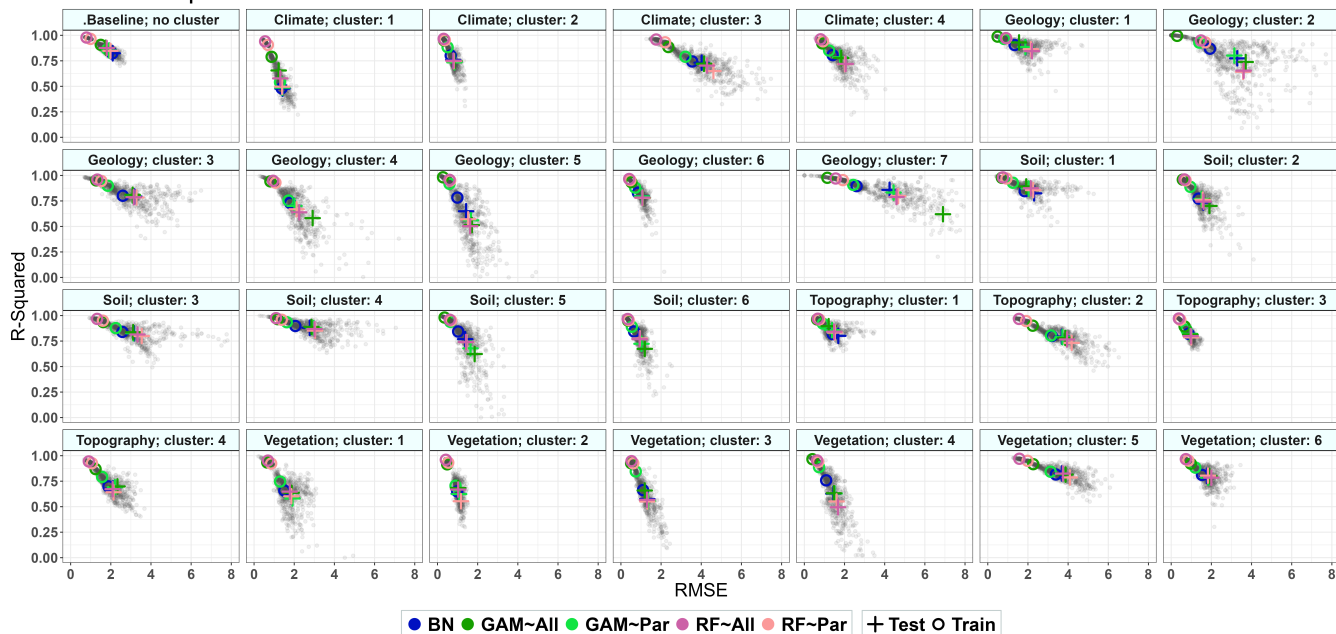

Fig S 32. R squared vs RMSE in each cluster for all models for high flow.

## 9 Runoff Ratio (runoff\_ratio)

### Pearson, Kendall, Spearman Correlations: Runoff Ratio

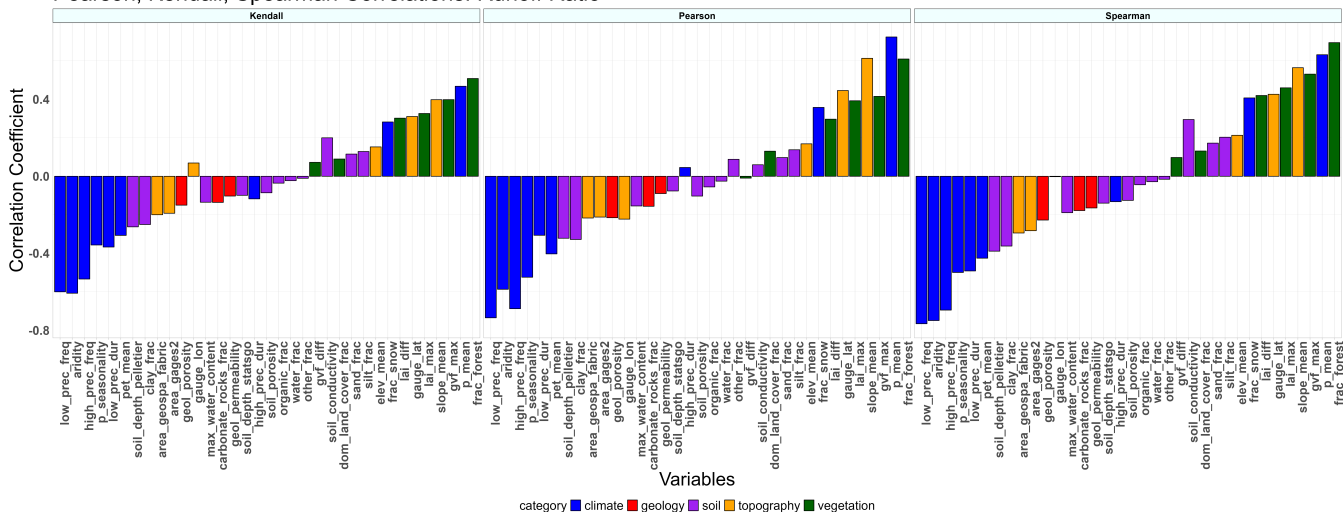

Fig S 33. Correlation analysis between catchment and climate attributes and runoff ratio

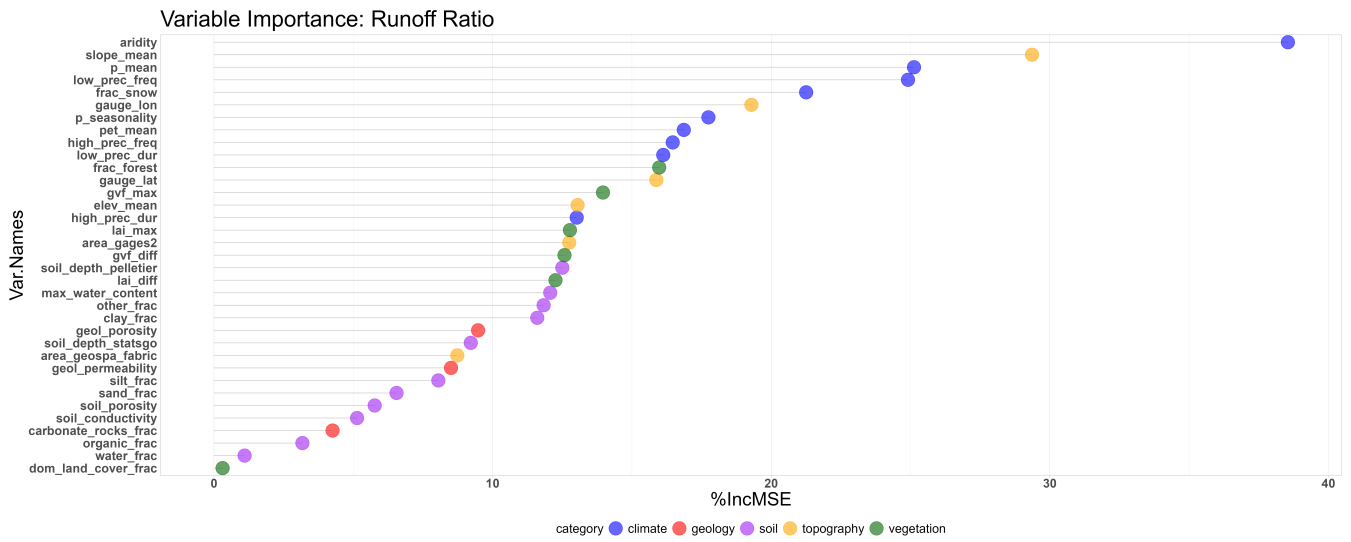

Fig S 34. Random forest variable importance analysis between catchment and climate attributes and runoff ratio

Estimated DAG for Runoff Ratio

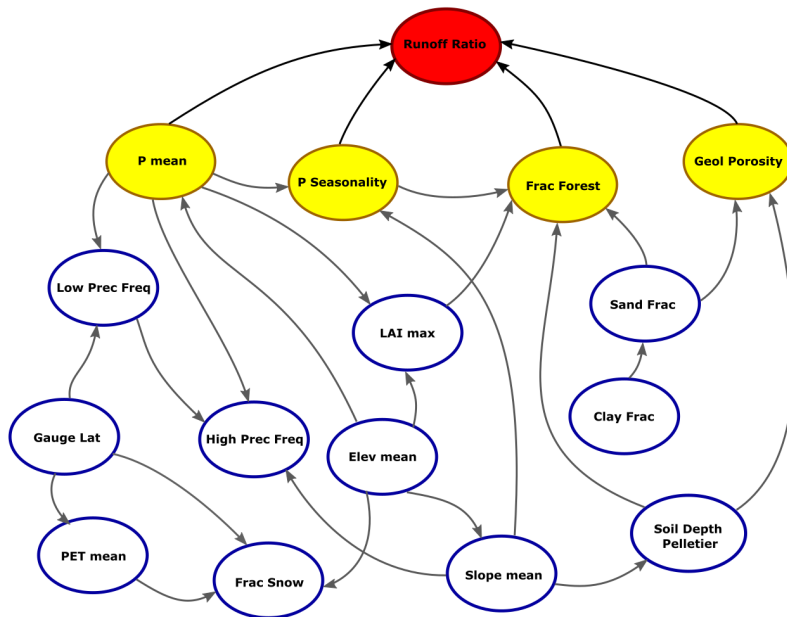

Fig S 35. Directed acyclic graph and selected variables for runoff ratio

## Runoff Ratio: R-Squared vs RMSE

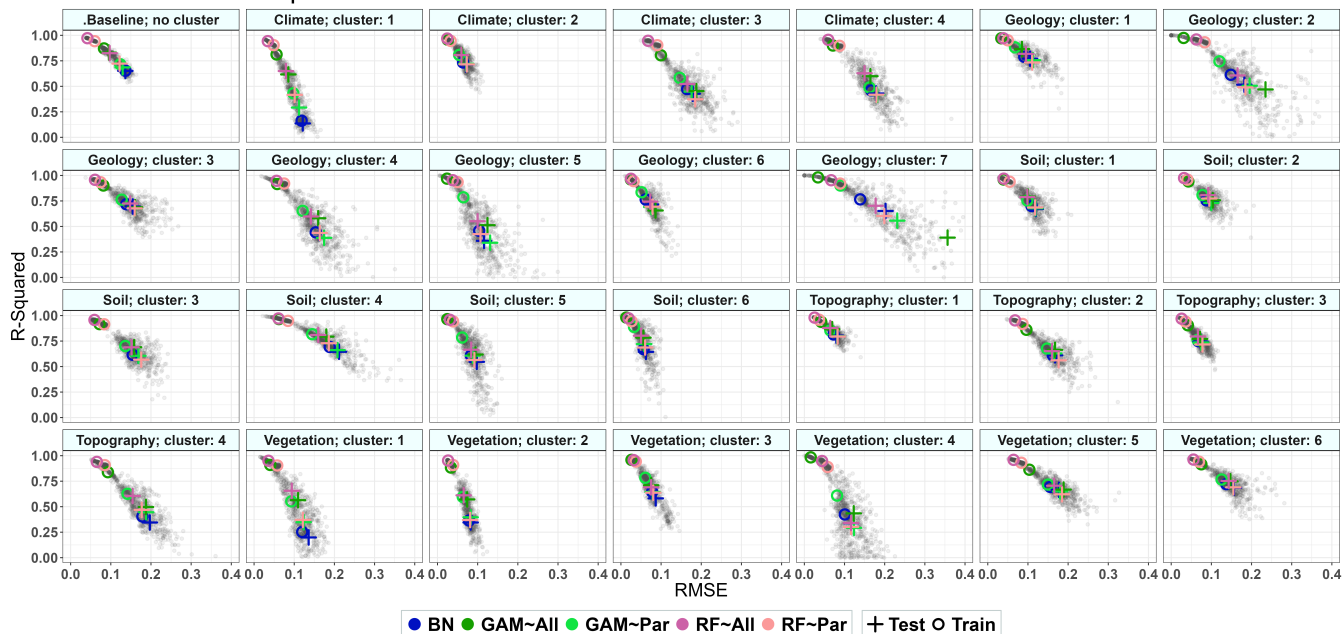

Fig S 36. R squared vs RMSE in each cluster for all models for runoff ratio.

## 10 Slope of Flow Duration Curve (slope\_FDC)

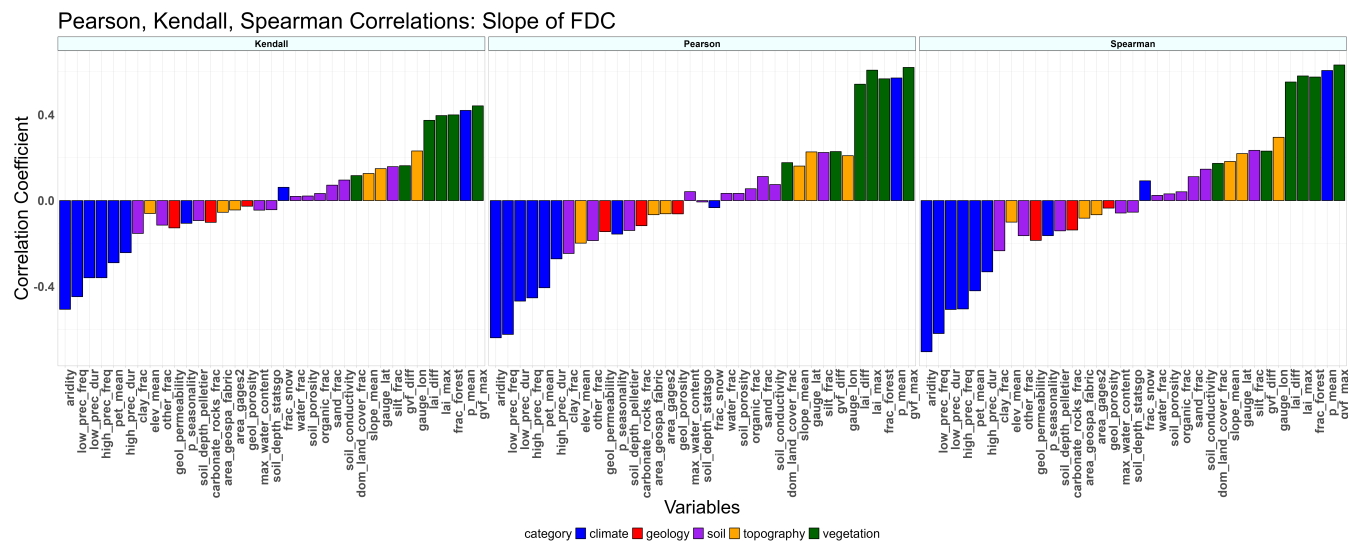

Fig S 37. Correlation analysis between catchment and climate attributes and the slope of flow duration curve

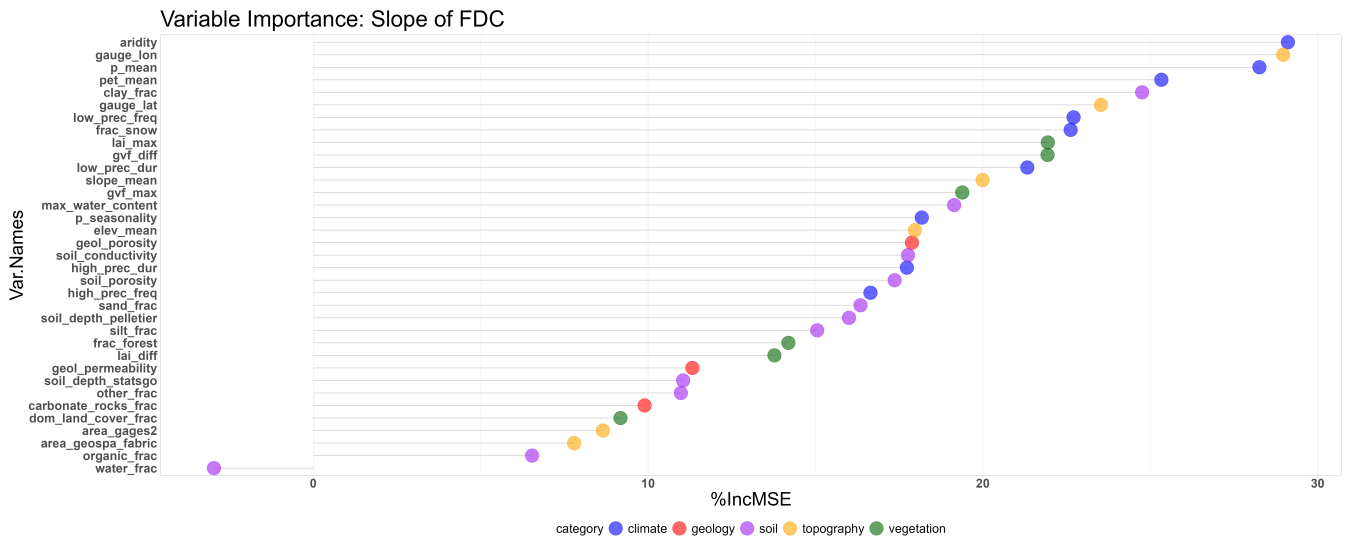

Fig S 38. Random forest variable importance analysis between catchment and climate attributes and the slope of flow duration curve

Estimated DAG for the Slope of FDC

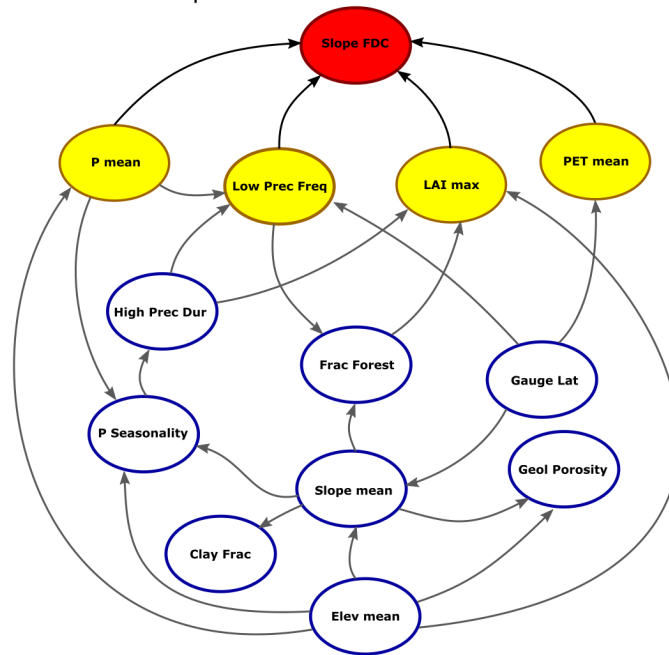

Fig S 39. Directed acyclic graph and selected variables for the slope of flow duration curve

### Slope of FDC: R-Squared vs RMSE

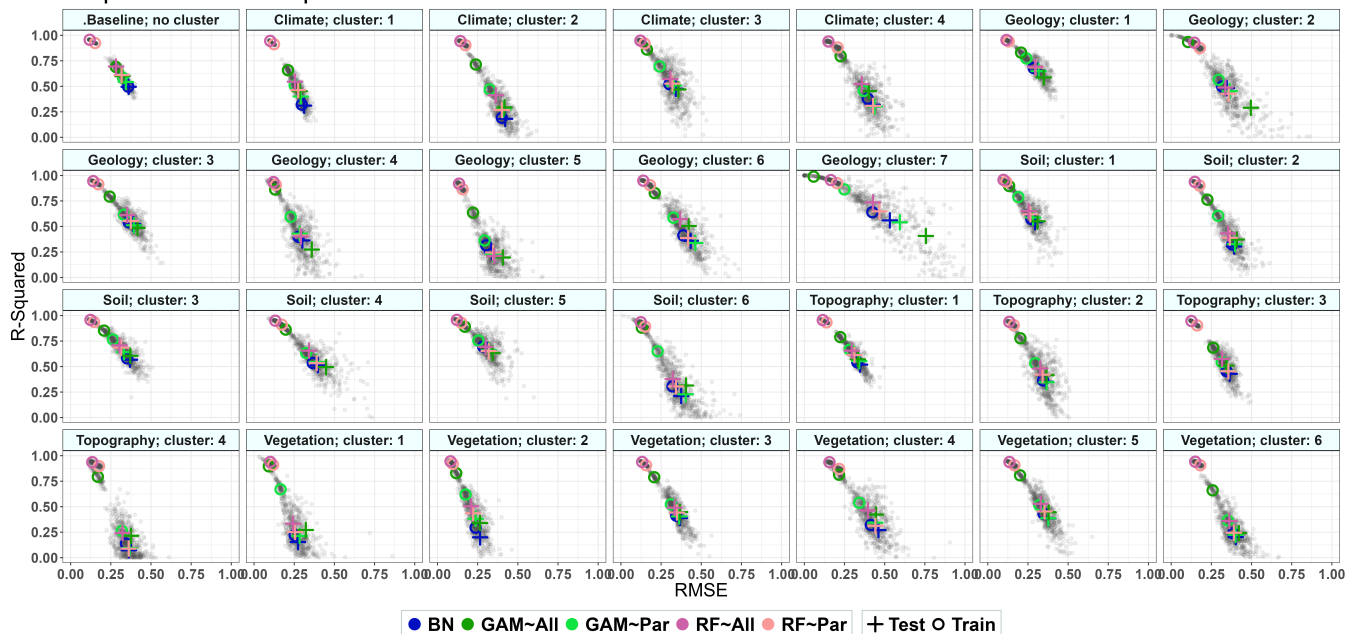

Fig S 40. R squared vs RMSE in each cluster for all models for the slope of flow duration curve.

## 11 Streamflow Elasticity (stream\_elast)

### Pearson, Kendall, Spearman Correlations: Stream Elasticity

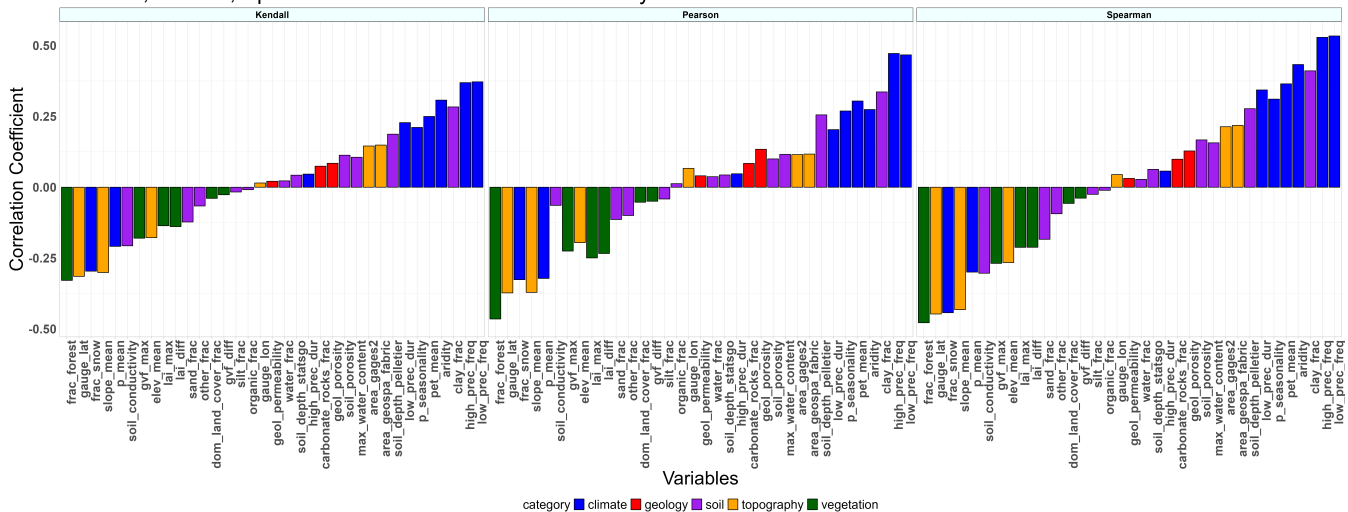

Fig S 41. Correlation analysis between catchment and climate attributes and streamflow elasticity

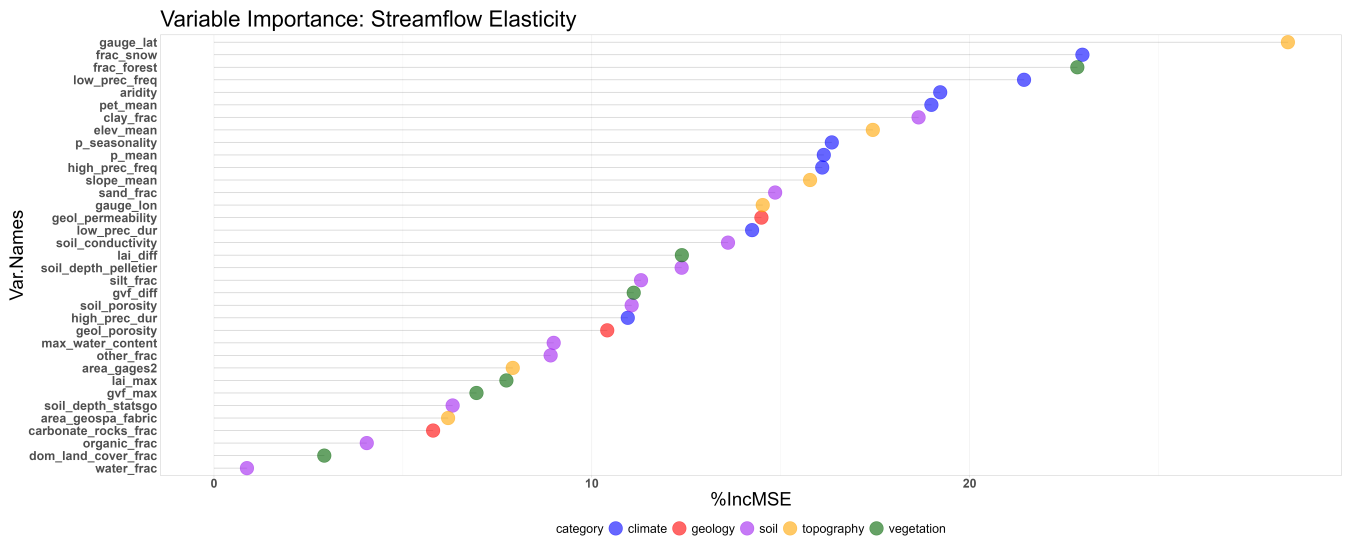

Fig S 42. Random forest variable importance analysis between catchment and climate attributes and streamflow elasticity

Estimated DAG for Stream Elasticity

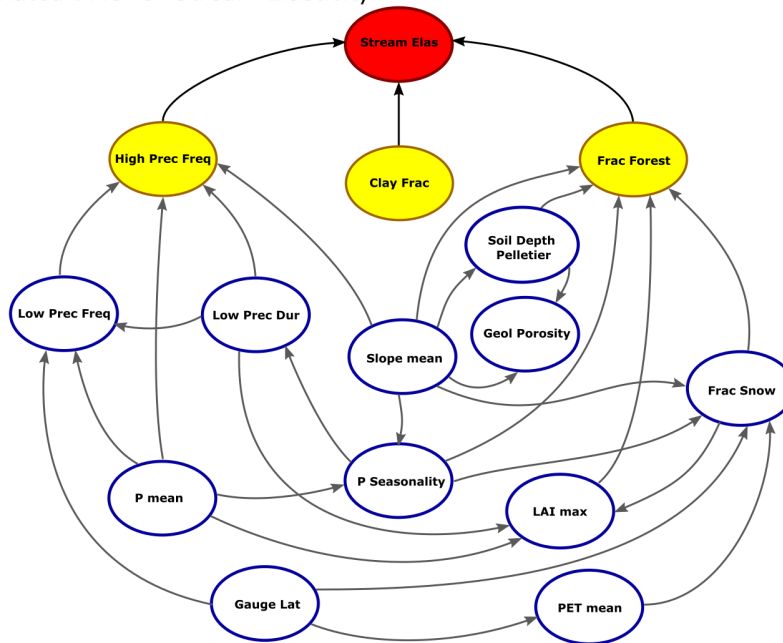

Fig S 43. Directed acyclic graph and selected variables for streamflow elasticity

### Stream Elasticity: R-Squared vs RMSE

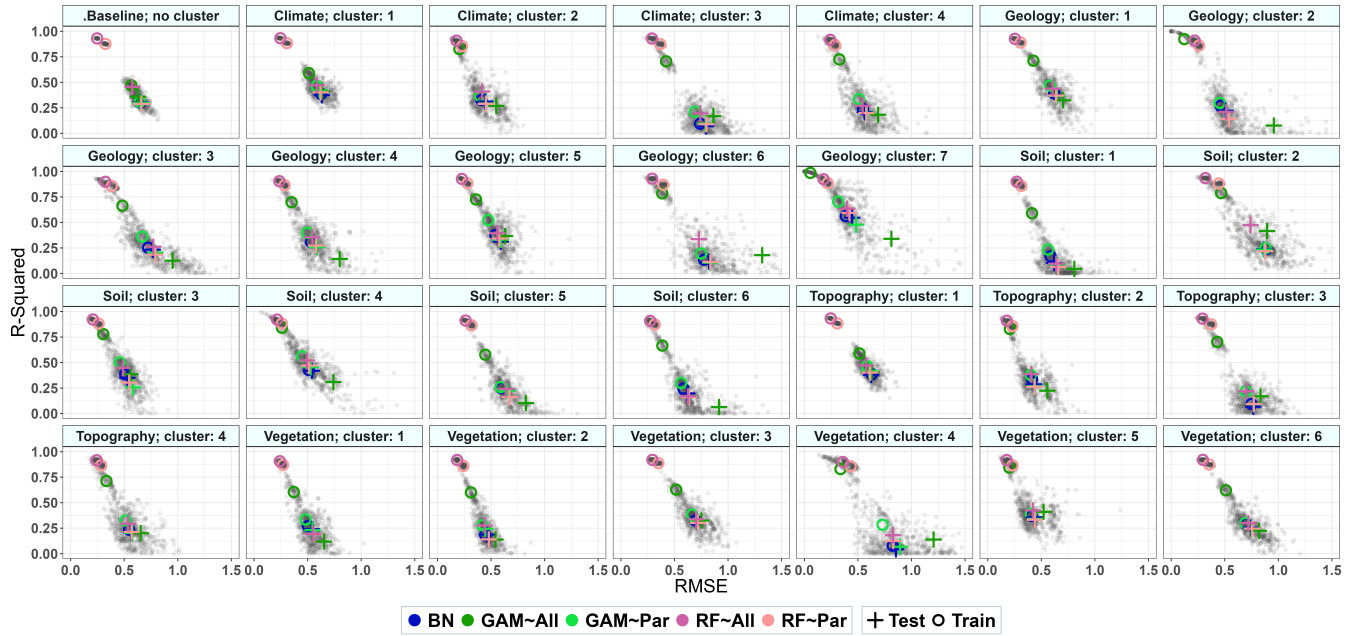

**Fig S 44.** R squared vs RMSE in each cluster for all models for streamflow elasticity.
